# Supplementary material
Source: publisher figshare collection journal article supplement (https://asha.figshare.com/articles/dataset/_/14794812)
Supplement: Supplementary file 1 [file 1]

### Supplemental Material S3.

#### *S3. Mean differences of each acoustic measure between each telepractice platform and the original recording.*

| <i>Telepractice Platform</i>          | <i>Vocal f<sub>0</sub> Mean (Hz)</i> | <i>Vocal f<sub>0</sub> SD (Hz)</i> | <i>Vocal f<sub>0</sub> range (Hz)</i> | <i>SPL range (dB)</i> | <i>HNR (vowel; dB)</i> | <i>L/H ratio (dB)</i> | <i>L/H ratio (vowel; dB)</i> | <i>CPPS (dB)</i> | <i>CPPS (vowel; dB)</i> |
|---------------------------------------|--------------------------------------|------------------------------------|---------------------------------------|-----------------------|------------------------|-----------------------|------------------------------|------------------|-------------------------|
| <i>Cisco WebEx</i>                    | 10.75                                | 13.03                              | 17.88                                 | 31.58                 | -7.29                  | -3.10                 | -7.93                        | -1.443           | -4.205                  |
| <i>Doxy.me</i>                        | 13.20                                | 15.11                              | 27.61                                 | 2.65                  | -6.89                  | -5.69                 | -0.92                        | -1.878           | -4.490                  |
| <i>Microsoft Teams</i>                | 6.77                                 | 6.17                               | 14.05                                 | -5.53                 | -6.68                  | -3.92                 | 0.26                         | -2.338           | -4.643                  |
| <i>VSee Messenger</i>                 | 14.80                                | 15.27                              | 26.32                                 | 3.82                  | -7.31                  | -5.41                 | -0.19                        | -2.028           | -4.690                  |
| <i>Zoom used with enhancements</i>    | 15.48                                | 16.15                              | 27.10                                 | 13.85                 | -5.49                  | -5.72                 | -4.53                        | -1.459           | -4.187                  |
| <i>Zoom used without enhancements</i> | 25.01                                | 28.35                              | 17.28                                 | -10.71                | -9.02                  | -0.54                 | 4.52                         | -2.183           | -4.495                  |
