# Supplementary material
Source: publisher figshare collection journal article supplement (https://asha.figshare.com/articles/dataset/_/14794812)

## Supplemental Material S1.

### *S1. Guidelines for recording from telepractice platforms in real-time via Praat Software.*

#### PC Users (Windows 10)

1. Unplug headphones from computer.
2. Set system recording volume.
  - a. To enable Stereo Mix:
    - i. Right click on speaker icon (🔊) in bottom right toolbar and select “Sounds”  
or go to “Sound” in system settings and select “Sound Control Panel” from Related Settings (see *Figure S1-1(a)*).
    - ii. Select “Recording” tab in the Sound Control Panel window.
    - iii. Right click on a recording device and select “Show disabled devices.”
    - iv. Right click on Stereo mix and select “Enable.”
    - v. Make “Stereo Mix” the Default Device and the microphone you are using the default communication device by right clicking on each recording device (see *Figure S1-1(b)*).
  - b. If you have Stereo Mix enabled:
    - i. Right click on Stereo Mix and select “Properties” and click the “Levels” tab.
    - ii. Set the volume level to 50% and click “OK.”
3. Go to Praat, select “New” and “Record Mono Sound.”

#### Mac Users (iOS)

1. Download the application “Soundflower.”
2. Select “Window” on the Task bar, and click “Audio Devices.”
3. Make a new Multi-Output Device by pressing the + sign at the bottom left of the Audio Devices window (see *Figure S1-2(a)*).
4. Select the output speaker you are utilizing and Soundflower (2ch) as output devices.
5. Right click on the Multi-Output Device and the Multi-Output Device the output device of choice. The speaker icon (🔊) should now appear in front of Multi-Output.
6. Again from Window, click on “Audio Devices” and make Soundflower (2ch) the Sound Input Device of choice. The microphone icon (🎤) should now appear in front of Soundflower (2h).
7. In Sound Settings, confirm that Multi-Output is selected as the sound output (see *Figure S1-2(b)*).
8. Go to Praat, select “New” and “Record Mono Sound.” Select Soundflower (2ch) as the input source (see *Figure S1-2(c)*).

**Figure S1-1. Sound Settings in Windows 10 for recording from telepractice platform in Praat software.** a. Opening Sound Control Panel in system sound settings. b. Selecting Stereo Mix as Recording device.

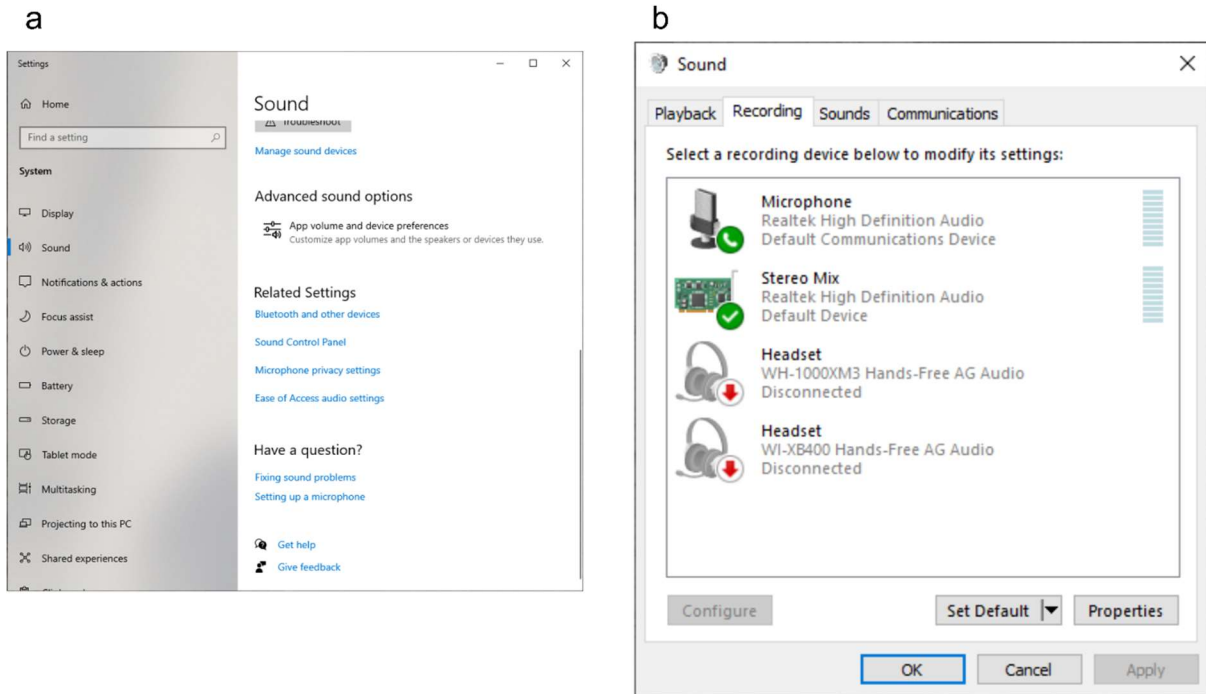

**Figure S1-2. Sound Settings in iOS for recording from telepractice platform in Praat software.** a. Generating a Multi-Output Device. b. Selecting Multi-Output Device as sound output. c. Selecting Soundflower(2ch) as input source for the recording.

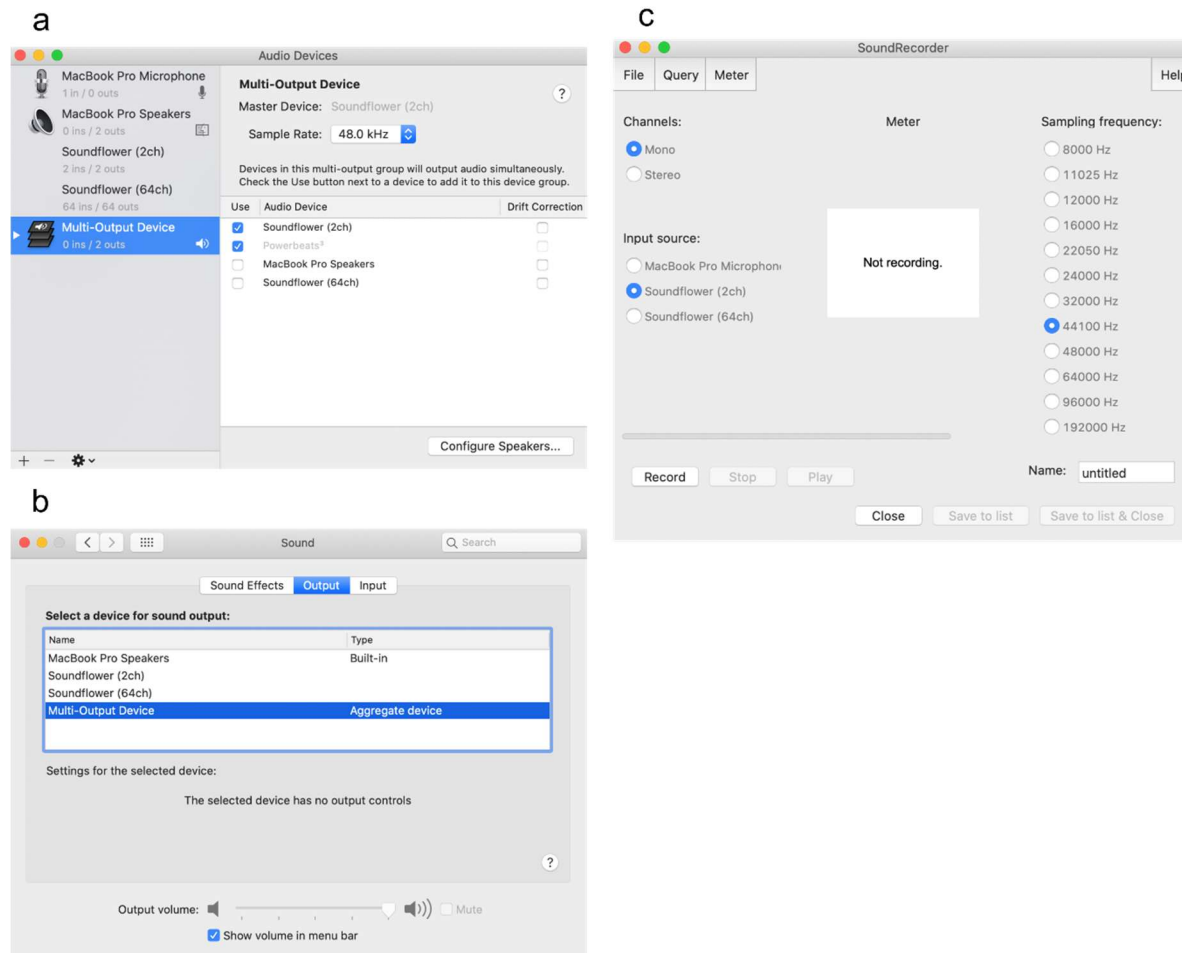

Supplement: Supplementary file 2 [file 1]
