# Supplementary material
Source: publisher figshare collection journal article supplement (https://asha.figshare.com/articles/dataset/_/14794812)

## **Supplemental Material S2.**

### ***S2. Directions for turning off the computer audio gain control for microphone and speaker.***

#### PC Users (Windows 10)

1. Right click on speaker icon (🔊) in bottom right toolbar and select “Sounds” or go to “Sound” in system settings and select “Sound Control Panel” from Related Settings.
  - i. Select “Playback” tab in the Sound Control Panel window.
  - ii. Right click on the speaker utilized and go to “Properties.”
  - iii. Got to the “Enhancements” tab in speaker properties and uncheck all sound effects (see *Figure S2-1(a)*).
  - iv. Select “Recording” tab in the Sound Control panel window.
  - v. Right click on the microphone utilized and go to “Properties.”
  - vi. Go to “Enhancements” tab and uncheck all sound effects (see *Figure S2-1(b)*).
  - vii. Select “Communications” tab in the Sound Control panel window.
  - viii. Select “Do nothing” radio button as the option When Windows detects communication activity (see *Figure S2-1(c)*).

#### Mac Users (iOS)

1. In Mac ‘Sound Settings,’ go to “Input” tab.
2. Uncheck “Use ambient noise reduction” option under “Settings for the selected devices” (see *Figure S2-2*).

**Figure S2-1. Sound Settings for disabling audio enhancements in Windows 10.** *a. Disabling speaker audio enhancements. b. Disabling microphone audio enhancements. c. Disabling adaptive volume control.*

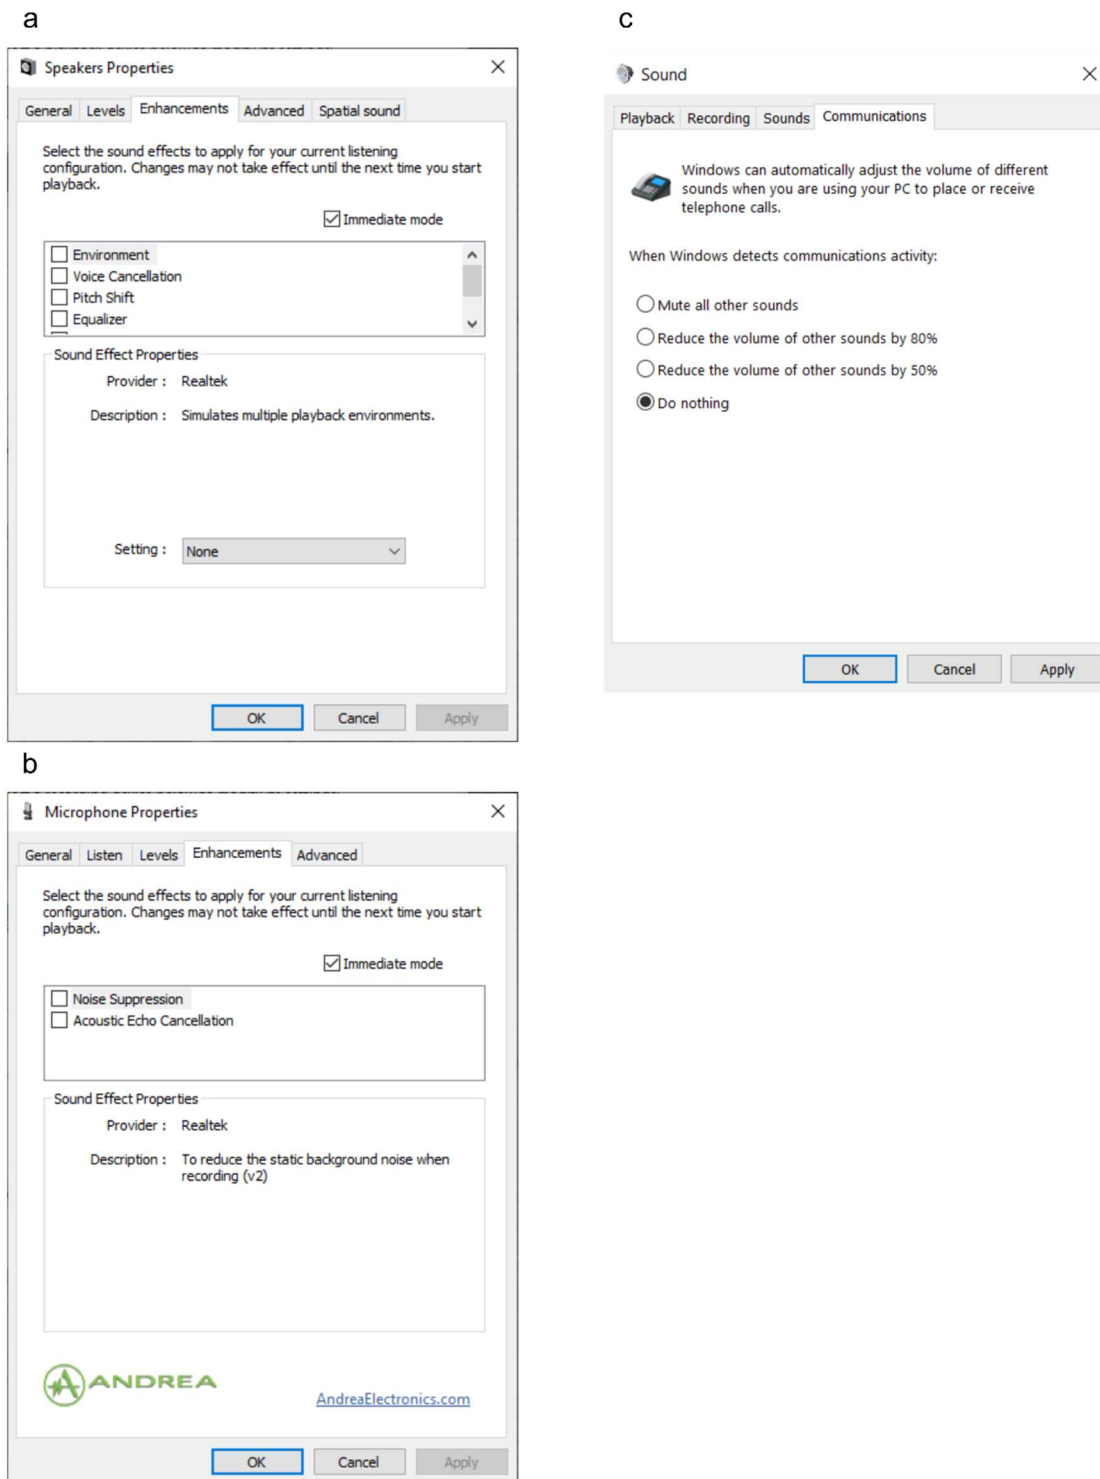

**Figure S2-2. Sound Settings for disabling microphone audio enhancements in iOS.**

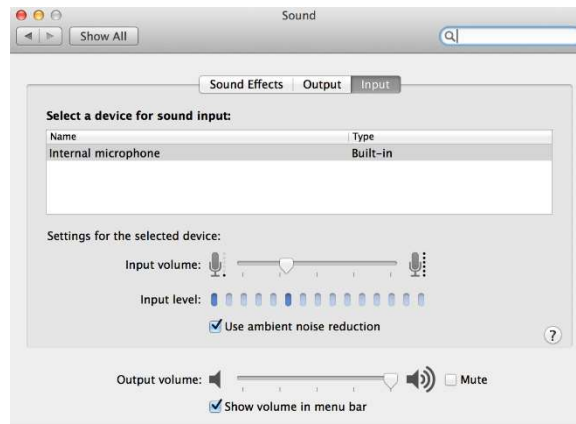

Supplement: Supplementary file 3 [file 1]
